# Supplementary material
Source: publisher site journal article supplement (https://www.dovepress.com/article/537500)
Supplement: Supplementary file 1 [file 537500-supplementary-information%20CLEAN.docx]

**Supplementary Information 1**. General information about the physicians involved in the study

|  |  |  | Results by hospital level | | | |
| --- | --- | --- | --- | --- | --- | --- |
|  |  | Total sample (N = 109) | CHC group (N = 32) | SH group (N = 33) | TH group (N = 44) | *P* |
| Gender |  |  |  |  |  | 0.78 |
| included: | Male - no. (%) | 49 (45.0) | 15 (46.9) | 16 (48.5) | 18 (40.9) |  |
|  | Female - no. (%) | 60 (55.0) | 17 (53.1) | 17 (51.5) | 26 (59.1) |  |
| Age (yr) |  |  | 40.8 ± 8.0 | 40.6 ± 7.6 | 41.1 ± 7.4 | 0.96 |
| included: | Under 30 years old - no. (%) | 4 (3.7) | 3 (9.4) | 1 (3.0) | 0 |  |
|  | 30-39 years old - no. (%) | 52 (47.7) | 12 (37.5) | 14 (42.4) | 26 (59.1) |  |
|  | 40-49 years old - no. (%) | 38 (34.9) | 11 (34.4) | 15 (45.5) | 12 (27.3) |  |
|  | 50 years old and above - no. (%) | 15 (13.8) | 6 (18.8) | 3 (9.1) | 6 (13.6) |  |
| Educational background |  |  |  |  |  | <0.001 |
| included: | Junior colleges - no. (%) | 9 (8.3) | 6 (18.8) | 2 (6.1) | 1 (2.2) |  |
|  | undergraduate - no. (%) | 45 (41.3) | 21 (65.6) | 22 (66.7) | 2 (4.5) |  |
|  | Master's degree - no. (%) | 18 (16.5) | 5 (15.6) | 6 (18.2) | 7 (15.9) |  |
|  | Doctor - no. (%) | 37 (33.9) | 0 | 3 (9.1) | 34 (77.3) |  |
| Years of practice - yr |  |  | 16.1 ± 10.4 | 16.2 ± 9.1 | 14.3 ± 8.1 | 0.6 |
| included: | Less than 10 years - no. (%) | 30 (27.5) | 7 (21.9) | 9 (27.3) | 14 (31.8) |  |
|  | 10-19 years - no. (%) | 49 (45.0) | 17 (53.1) | 12 (36.4) | 20 (45.5) |  |
|  | 20-29 years - no. (%) | 20 (18.3) | 4 (12.5) | 9 (27.3) | 7 (15.9) |  |
|  | Greater than 30 years - no. (%) | 10 (9.2) | 4 (12.5) | 3 (9.1) | 3 (6.8) |  |
| Professional title |  |  |  |  |  | 0.051 |
| include: | Resident physician - no. (%) | 8 (7.3) | 5 (15.6) | 3 (9.1) | 0 |  |
|  | Attending physician - no. (%) | 47 (43.1) | 15 (46.9) | 11 (33.3) | 21 (47.7) |  |
|  | associate chief physician - no. (%) | 37 (33.9) | 11 (34.4) | 11 (33.3) | 15 (34.1) |  |
|  | chief physician - no. (%) | 17 (15.6) | 1 (3.1) | 8 (24.2) | 8 (18.2) |  |
| Number of patients managed per month no. |  |  | 17.6 ± 6.1 | 31.2 ± 21.4 | 30.3 ± 19.9 | 0.007 |

* Plus–minus values are expressed as the means ± SDs.

**Supplementary Information 2.** Results of the status section questionnaire used in this study

|  | |  | Results by hospital level | | |
| --- | --- | --- | --- | --- | --- |
| Total sample (N = 109) | CHC group (N = 32) | SH group (N = 33) | TH group (N = 44) |
| Which of the following types of inhaled medications can currently be prescribed at your hospital? (Multiple choice) | |  |  |  |  |
|  | LAMA | 73(40.6%) | 13(40.6%) | 22(66.7%) | 38(86.4%) |
|  | LABA | 54(49.5%) | 10(31.3%) | 20(62.5%) | 24(54.5%) |
|  | ICS | 71(65.1%) | 20(62.5%) | 22(66.7%) | 29(65.9%) |
|  | ICS/LABA | 92(84.4%) | 21(65.6%) | 32(97.0%) | 39(88.6%) |
|  | LABA/LAMA | 74(67.9%) | 8(25%) | 26(81.3%) | 42(95.5%) |
|  | ICS/LABA/LAMA | 76(69.7%) | 11(34.4%) | 25(78.1%) | 40(90.9%) |
| Which guideline do you most often refer to when giving a prescription to a patient with COPD? (Single choice) | |  |  |  |  |
|  | Global initiative for chronic obstructive lung disease: 2023 Report | 88(80.7%) | 18(56.3%) | 28(84.8%) | 42(95.5%) |
|  | Guideline for the Diagnosis and Management of Chronic Obstructive Pulmonary Disease (2021 Revision) | 16(14.7%) | 10(31.3%) | 4(12.1%) | 2(4.5%) |
|  | Expert Consensus on the Standardized Management of Glucocorticoids in Chronic Obstructive Pulmonary Disease (2021 Edition) | 0 | 0 | 0 | 0 |
|  | Guideline for Primary Care of Chronic Obstructive Pulmonary Disease (2018) | 5(4.6%) | 4(12.5%) | 1(3.0%) | 0 |
| Your opinion of LAMA is (multiple choice) | |  |  |  |  |
|  | LAMA are a guideline-recommended starting treatment for COPD | 77(70.6%) | 20(62.5%) | 27(81.8%) | 30(68.2%) |
|  | LAMA are most effective as an initial treatment for most patients with COPD. | 50(45.9%) | 15(46.9%) | 16(48.5%) | 19(43.2%) |
|  | For patients who are poorly controlled on LAMA, I would choose to upgrade to LABA / ICS. | 53(48.6%) | 22(68.8%) | 19(57.6%) | 12(27.3%) |
|  | For patients who are poorly controlled on LAMA, I would choose to upgrade to LABA/LAMA. | 77(70.6%) | 16(50%) | 26(78.8%) | 35(79.5%) |
| Your opinion of LABA/ICS is (multiple choice) | |  |  |  |  |
|  | LABA/ICS are most effective as an initial treatment for most patients with COPD. | 41(37.6%) | 16(50%) | 14(42.4%) | 11(25%) |
|  | In patients with severe or multisymptom COPD, the LABA/ICS regimen provides the most effective symptomatic relief. | 57(52.3%) | 23(71.9%) | 20(60.6%) | 14(31.8%) |
|  | ICS/LABA as an initial regimen for maintenance therapy are effective in preventing acute exacerbations in patients with COPD. | 56(51.4%) | 20(62.5%) | 20(60.6%) | 16(36.4%) |
|  | Long-term use of ICS-containing regimens can have a range of side effects. | 62(56.9%) | 16(50%) | 23(69.7%) | 23(52.3%) |
|  | Only certain patients with COPD can benefit from ICS-containing therapy. | 56(51.4%) | 7(21.9%) | 16(48.5%) | 33(75%) |
| Your opinion of LABA/LAMAs is (multiple choice) | |  |  |  |  |
|  | LABA/LAMAs are most effective as an initial treatment for most patients with COPD. | 76(69.7%) | 20(62.5%) | 26(78.8%) | 30(68.2%) |
|  | For patients who are not well controlled on LAMA, I would change the treatment to double bronchodilator therapy. | 94(86.2%) | 26(81.3%) | 30(90.9%) | 38(86.4%) |
|  | For patients with stable control and an EOS less than/equal to 100 cells/μL, I would withdraw ICS from the triple therapy and switch to a LAMA/LABA regimen. | 75(68.8%) | 19(59.4%) | 25(75.8%) | 31(70.5%) |
|  | I would switch to a LAMA/LABA regimen for patients with an EOS less than/equal to 100 cells/μL who are poorly controlled or not satisfactorily treated with ICS/LABA. | 72(66.1%) | 17(53.1%) | 23(69.7%) | 32(72.7%) |
|  | I would switch to a LAMA/LABA regimen for patients with COPD who are poorly controlled or not satisfactorily treated with ICS/LABA and have an EOS of 100-300 cells/μL. | 47(43.1%) | 11(34.4%) | 16(48.5%) | 20(45.5%) |
|  | For patients with stable control on ICS/LABA and an EOS ≤300 cells/μL, I would discontinue the ICS treatment and change the regimen to LABA/LAMA after a certain period of continued stability. | 49(45.0%) | 10(31.3%) | 19(57.6%) | 20(45.5%) |
| Your opinion of ICS/LABA/LAMA treatment (Triple Therapy) is (multiple choice) | |  |  |  |  |
|  | For patients with COPD who are poorly controlled on LAMA alone, my preference would be to upgrade to ICS/LABA/LAMA | 41(37.6%) | 17(53.1%) | 14(42.4%) | 10(22.7%) |
|  | For patients with COPD who are poorly controlled or unsatisfactorily treated with ICS/LABA, my preferred treatment option is to switch them to an ICS/LABA/LAMA regimen. | 94(86.2%) | 26(81.3%) | 32(97.0%) | 36(81.8%) |
|  | For patients being treated with ICS/LABA/LAMA, I would maintain the ICS/LABA/LAMA therapy regardless of its effectiveness, including in very stable patients, as this is already the highest level of therapy. | 38(34.9%) | 10(31.3%) | 14(42.4%) | 14(31.8%) |
|  | I would prioritize ICS/LABA/LAMA treatment for new patients in Group E who have more symptoms and poorer lung function. | 79(72.5%) | 18(56.3%) | 23(69.7%) | 38(86.4%) |
| Which indicators do you usually refer to when choosing whether to give a patient a dual or triple therapy (ICS/LABA or LAMA/LABA/ICS therapy)? (Multiple choice) | |  |  |  |  |
|  | Number and degree of acute exacerbations | 107(98.2%) | 32(100%) | 32(97.0%) | 43(97.7%) |
|  | Blood EOS count | 100(91.7%) | 27(84.4%) | 31(93.9%) | 42(95.5%) |
|  | Age | 51(46.8%) | 20(62.5%) | 18(54.5%) | 13(29.5%) |
|  | Severity of symptoms | 84(77.1%) | 29(90.6%) | 26(78.8%) | 29(65.9%) |
|  | Severity of airflow limitation | 73(67.0%) | 28(87.5%) | 22(66.7%) | 23(52.3%) |
|  | Other | 24(22.0%) | 5(15.6%) | 8(24.2%) | 11(25%) |
| If you decide to discontinue ICS (inhaled glucocorticosteroids) from a patient's original regimen, which indicator would you be most concerned about? (single choice) | |  |  |  |  |
|  | Number and degree of acute exacerbations | 57(52.3%) | 18(56.2%) | 14(42.4%) | 25(56.8%) |
|  | Blood EOS count | 52(47.7%) | 14(43.8%) | 19(57.6%) | 19(43.2%) |
| For which of the following reasons would you consider discontinuing ICS treatment in a patient? (Multiple choice) | |  |  |  |  |
|  | Combined Pneumonia | 63(57.8%) | 11(34.4%) | 20(60.6%) | 32(72.7%) |
|  | Indications for the use of ICS no longer exist | 79(72.5%) | 24(75%) | 25(75.8%) | 30(68.2%) |
|  | Poor response to ICS therapy | 76(69.7%) | 21(65.6%) | 25(75.8%) | 30(68.2%) |
|  | No comorbid asthma | 38(34.9%) | 14(43.8%) | 9(27.3%) | 15(34.1%) |
|  | Comorbid diabetes mellitus | 31(28.4%) | 16(50%) | 8(24.2%) | 7(15.9%) |
|  | Comorbid osteoporosis | 39(35.8%) | 15(46.9%) | 16(48.5%) | 8(18.2%) |
|  | Comorbid cardiovascular disease | 17(15.6%) | 7(21.9%) | 6(18.2%) | 4(9.1%) |
|  | Side effects associated with ICS therapy | 95(87.2%) | 28(87.5%) | 29(87.9%) | 38(86.4%) |
|  | Would not consider discontinuing ICS for any reason | 1(0.9%) | 1(3.1%) | 0 | 0 |
